# Supplementary material
Source: publisher figshare collection journal article supplement (https://acs.figshare.com/ndownloader/files/5111845)
Supplement: Supplementary file 1 [file 5111845]

# checkCIF/PLATON report

No syntax errors found.

Please wait while processing ....

[CIF dictionary](#)

[Interpreting this report](#)

## Datablock: tha

---

|                                 |                                   |                    |
|---------------------------------|-----------------------------------|--------------------|
| Bond precision:                 | C-C = 0.0017 A                    | Wavelength=0.71073 |
| Cell:                           | a=7.0320(19)                      | b=14.376(4)        |
|                                 | alpha=90                          | beta=93.737(5)     |
|                                 |                                   | gamma=90           |
|                                 | Calculated                        | Reported           |
| Volume                          | 1630.7(8)                         | 1630.7(8)          |
| Space group                     | P 21/n                            | P2(1)/n            |
| Hall group                      | -P 2yn                            | ?                  |
| Moiety formula                  | C6 H9 Be N2 O6, C6 H5 N2 O4, H2 O | ?                  |
| Sum formula                     | C12 H16 Be N4 O11                 | C12 H16 Be N4 O11  |
| Mr                              | 401.30                            | 401.30             |
| Dx,g cm-3                       | 1.635                             | 1.635              |
| Z                               | 4                                 | 4                  |
| Mu (mm-1)                       | 0.144                             | 0.144              |
| F000                            | 832.0                             | 832.0              |
| F000'                           | 832.57                            |                    |
| h,k,lmax                        | 8,18,20                           | 8,17,20            |
| Nref                            | 3355                              | 3318               |
| Tmin,Tmax                       | 0.939,0.960                       |                    |
| Tmin'                           | 0.939                             |                    |
| Correction method= Not given    |                                   |                    |
| Data completeness= Ratio = 0.99 | Theta(max)= 26.45                 |                    |
| R(reflections)= 0.0289( 2839)   | wR2(reflections)= 0.0796( 3318)   |                    |
| S = 1.041                       | Npar= 319                         |                    |

---

The following ALERTS were generated. Each ALERT has the format

**test-name\_ALERT\_alert-type\_alert-level.**

Click on the hyperlinks for more details of the test.

---

### Alert level C

|                                   |                                                 |           |
|-----------------------------------|-------------------------------------------------|-----------|
| <a href="#">PLAT432_ALERT_2_C</a> | Short Inter X...Y Contact O8 .. C5 ..           | 2.97 Ang. |
| <a href="#">PLAT432_ALERT_2_C</a> | Short Inter X...Y Contact C4 .. C4 ..           | 3.15 Ang. |
| <a href="#">PLAT790_ALERT_4_C</a> | Centre of Gravity not Within Unit Cell: Resd. # | 1         |
|                                   | C6 H9 Be N2 O6                                  |           |
| <a href="#">PLAT790_ALERT_4_C</a> | Centre of Gravity not Within Unit Cell: Resd. # | 2         |
|                                   | C6 H5 N2 O4                                     |           |
| <a href="#">PLAT790_ALERT_4_C</a> | Centre of Gravity not Within Unit Cell: Resd. # | 3         |
|                                   | H2 O                                            |           |

- 
- 0 **ALERT level A** = In general: serious problem  
0 **ALERT level B** = Potentially serious problem  
5 **ALERT level C** = Check and explain  
0 **ALERT level G** = General alerts; check
- 0 ALERT type 1 CIF construction/syntax error, inconsistent or missing data  
2 ALERT type 2 Indicator that the structure model may be wrong or deficient  
0 ALERT type 3 Indicator that the structure quality may be low  
3 ALERT type 4 Improvement, methodology, query or suggestion
- 

### **Publication of your CIF in IUCr journals**

A basic structural check has been run on your CIF. These basic checks will be run on all CIFs submitted for publication in IUCr journals (*Acta Crystallographica*, *Journal of Applied Crystallography*, *Journal of Synchrotron Radiation*); however, if you intend to submit to *Acta Crystallographica Section C* or *E*, you should make sure that [full publication checks](#) are run on the final version of your CIF prior to submission.

### **Publication of your CIF in other journals**

Please refer to the *Notes for Authors* of the relevant journal for any special instructions relating to CIF submission.

---

**PLATON version of 23/11/2004; check.def file version of 17/11/2004**

### **Datablock tha - ellipsoid plot**

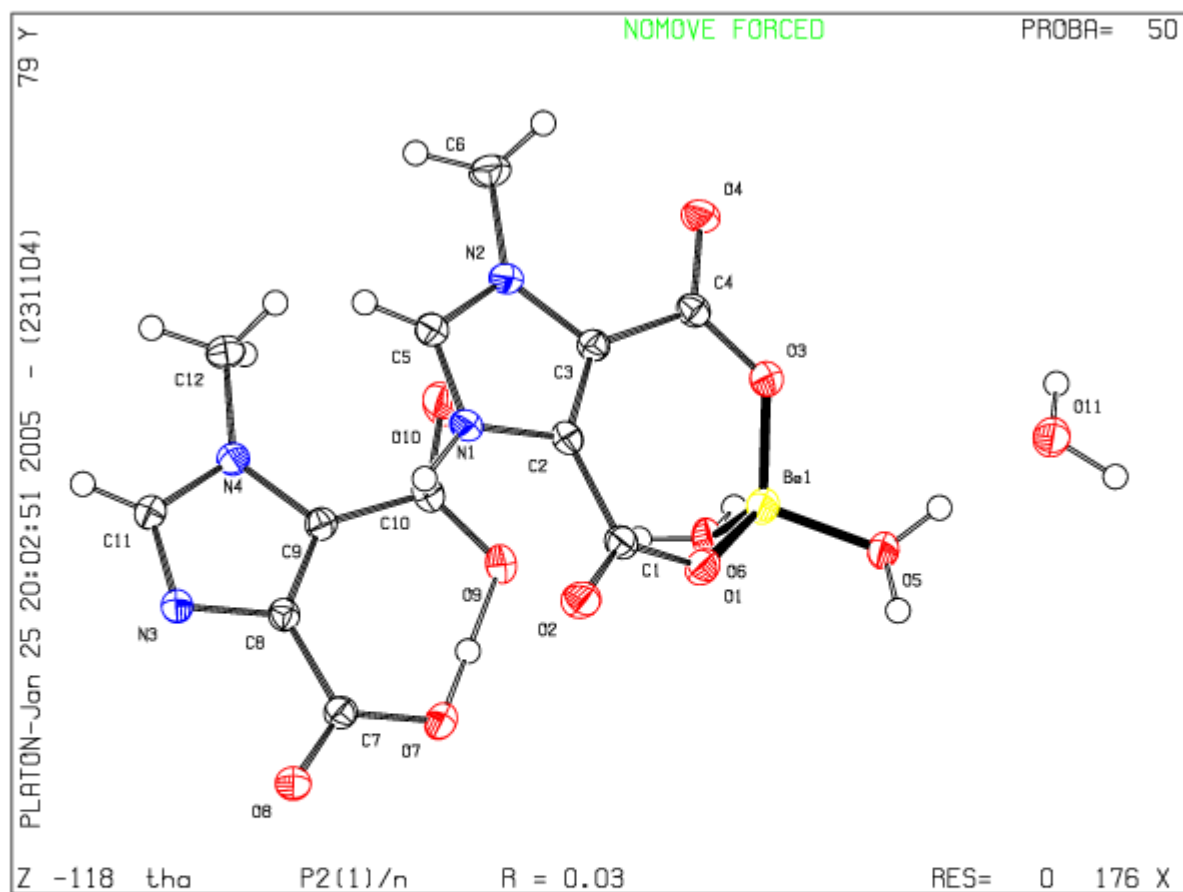

[Download CIF editor \(enCIFer\) from the CCDC](#)  
[Test a new CIF entry](#)
